# Supplementary material for: Weight Loss and Decrease of Body Mass Index during Allogeneic Stem Cell Transplantation Are Common Events with Limited Clinical Impact
Source: PubMed Central journal article supplement (PMC4689501; doi:10.1371/journal.pone.0145445), 2015-12-18
Supplement: pone.0145445.s001.pdf [file pone.0145445.s001.pdf]

| 1    | 2    | 3 | 4   | 5   | 6    | 7 | 8 | Legend                                            |
|------|------|---|-----|-----|------|---|---|---------------------------------------------------|
| 17,3 | 17,2 | 2 | 21  | 321 | 321  | 0 | 1 | 1 BMI Admission                                   |
| 17,3 | 17,8 | 2 | 15  | 144 | 144  | 0 | 1 | 2 BMI Discharge                                   |
| 17,5 | 16,8 | 1 | 17  | 27  | 1048 | 0 | 1 | 3 Conditioning regimen (myeloablative: 1, RIC: 2) |
| 17,5 | 17,1 | 1 | 18  | 21  | 1281 | 1 | 1 | 4 Neutropenia (days)                              |
| 18,2 | 16,3 | 1 | 22  | 320 | 1250 | 1 | 1 | 5 Thrombocytopenia (days)                         |
| 19,1 | 17,7 | 2 | 58  | 792 | 1049 | 1 | 1 | 6 Overall survival (days)                         |
| 19,1 | 18,0 | 2 | 16  | 32  | 1130 | 0 | 0 | 7 Alive (yes: 1)                                  |
| 20,1 | 19,7 | 2 | 16  | 13  | 670  | 0 | 1 | 8 any GvH-D (yes: 1)                              |
| 20,1 | 19,3 | 2 | 13  | 16  | 1206 | 1 | 1 |                                                   |
| 20,1 | 19,6 | 1 | 24  | 28  | 828  | 1 | 0 |                                                   |
| 20,2 | 22,6 | 2 | 17  | 190 | 608  | 0 | 1 |                                                   |
| 20,3 | 20,7 | 2 | 15  | 26  | 1461 | 1 | 1 |                                                   |
| 20,6 | 20,9 | 2 | 52  | 490 | 951  | 1 | 1 |                                                   |
| 20,7 | 20,3 | 2 | 21  | 23  | 1219 | 1 | 1 |                                                   |
| 20,8 | 19,6 | 2 | 16  | 22  | 1130 | 1 | 0 |                                                   |
| 20,9 | 20,8 | 2 | 13  | 12  | 155  | 0 | 0 |                                                   |
| 20,9 | 19,8 | 2 | 39  | 195 | 1040 | 1 | 0 |                                                   |
| 20,9 | 17,5 | 2 | 12  | 39  | 1246 | 1 | 1 |                                                   |
| 21,1 | 20,1 | 1 | 26  | 25  | 1037 | 1 | 1 |                                                   |
| 21,2 | 23,2 | 2 | 33  | 33  | 33   | 0 | 0 |                                                   |
| 21,2 | 20,3 | 2 | 12  | 30  | 1195 | 1 | 1 |                                                   |
| 21,3 | 21,2 | 2 | 15  | 27  | 159  | 0 | 0 |                                                   |
| 21,3 | 20,5 | 1 | 20  | 17  | 1085 | 1 | 1 |                                                   |
| 21,3 | 21,8 | 2 | 15  | 19  | 965  | 1 | 1 |                                                   |
| 21,5 | 20,4 | 2 | 13  | 13  | 1658 | 1 | 1 |                                                   |
| 21,5 | 20,7 | 2 | 22  | 14  | 1336 | 1 | 1 |                                                   |
| 21,7 | 20,9 | 2 | 21  | 99  | 99   | 0 | 1 |                                                   |
| 21,7 | 21,9 | 1 | 27  | 107 | 1330 | 1 | 1 |                                                   |
| 21,8 | 21,5 | 1 | 19  | 29  | 231  | 0 | 1 |                                                   |
| 21,8 | 20,6 | 2 | 16  | 17  | 1174 | 1 | 1 |                                                   |
| 21,9 | 21,6 | 2 | 18  | 36  | 190  | 0 | 1 |                                                   |
| 22,0 | 19,6 | 2 | 14  | 118 | 1253 | 1 | 1 |                                                   |
| 22,0 | 20,6 | 1 | 26  | 35  | 1267 | 1 | 1 |                                                   |
| 22,2 | 16,7 | 2 | 23  | 17  | 349  | 0 | 1 |                                                   |
| 22,2 | 20,9 | 2 | 13  | 12  | 1317 | 1 | 1 |                                                   |
| 22,2 | 20,5 | 2 | 31  | 18  | 84   | 1 | 1 |                                                   |
| 22,2 | 21,8 | 2 | 16  | 21  | 960  | 0 | 1 |                                                   |
| 22,3 | 24,1 | 2 | 26  | 80  | 80   | 0 | 0 |                                                   |
| 22,3 | 20,9 | 2 | 24  | 20  | 626  | 0 | 0 |                                                   |
| 22,4 | 20,4 | 2 | 16  | 29  | 957  | 1 | 0 |                                                   |
| 22,4 | 23,9 | 2 | 11  | 11  | 11   | 0 | 0 |                                                   |
| 22,4 | 21,7 | 2 | 13  | 23  | 1369 | 1 | 1 |                                                   |
| 22,4 | 20,6 | 1 | 56  | 75  | 1191 | 1 | 1 |                                                   |
| 22,5 | 24,6 | 2 | 155 | 155 | 155  | 0 | 0 |                                                   |
| 22,7 | 23,2 | 2 | 12  | 12  | 12   | 0 | 1 |                                                   |
| 22,7 | 20,8 | 2 | 35  | 705 | 1354 | 1 | 1 |                                                   |
| 22,8 | 21,0 | 2 | 17  | 32  | 1148 | 1 | 1 |                                                   |
| 22,8 | 21,1 | 2 | 15  | 95  | 1012 | 1 | 1 |                                                   |
| 23,0 | 23,6 | 2 | 17  | 33  | 1315 | 1 | 1 |                                                   |
| 23,1 | 22,1 | 2 | 15  | 17  | 291  | 0 | 1 |                                                   |
| 23,1 | 22,7 | 2 | 41  | 41  | 257  | 0 | 1 |                                                   |
| 23,4 | 21,1 | 2 | 16  | 147 | 971  | 1 | 1 |                                                   |
| 23,4 | 22,6 | 2 | 14  | 15  | 1461 | 1 | 1 |                                                   |
| 23,4 | 20,9 | 2 | 17  | 28  | 137  | 0 | 0 |                                                   |
| 23,5 | 23,5 | 2 | 14  | 28  | 1282 | 1 | 1 |                                                   |
| 23,5 | 23,6 | 2 | 25  | 23  | 871  | 1 | 1 |                                                   |
| 23,5 | 21,5 | 2 | 27  | 28  | 1180 | 1 | 1 |                                                   |
| 23,6 | 19,5 | 2 | 17  | 15  | 952  | 1 | 1 |                                                   |
| 23,6 | 25,5 | 2 | 9   | 9   | 9    | 0 | 0 |                                                   |
| 23,6 | 23,0 | 2 | 36  | 960 | 960  | 1 | 0 |                                                   |
| 23,6 | 22,7 | 2 | 23  | 19  | 1260 | 1 | 1 |                                                   |
| 23,7 | 22,6 | 2 | 41  | 405 | 1022 | 1 | 1 |                                                   |

|      |      |   |    |      |      |   |   |
|------|------|---|----|------|------|---|---|
| 23,7 | 22,3 | 2 | 8  | 7    | 127  | 0 | 1 |
| 23,8 | 21,5 | 2 | 72 | 72   | 72   | 0 | 1 |
| 23,8 | 20,5 | 1 | 21 | 28   | 1449 | 1 | 1 |
| 24,0 | 22,4 | 2 | 14 | 12   | 1147 | 1 | 1 |
| 24,0 | 18,2 | 1 | 23 | 23   | 498  | 0 | 1 |
| 24,1 | 23,0 | 2 | 19 | 12   | 491  | 0 | 1 |
| 24,1 | 24,6 | 2 | 33 | 75   | 595  | 1 | 1 |
| 24,2 | 22,4 | 2 | 15 | 18   | 1027 | 1 | 1 |
| 24,2 | 24,8 | 2 | 8  | 8    | 8    | 0 | 0 |
| 24,2 | 21,9 | 2 | 13 | 11   | 1520 | 1 | 1 |
| 24,2 | 24,0 | 2 | 11 | 14   | 1210 | 1 | 1 |
| 24,2 | 21,7 | 1 | 34 | 61   | 159  | 0 | 1 |
| 24,3 | 24,2 | 2 | 18 | 22   | 1469 | 1 | 0 |
| 24,4 | 21,8 | 2 | 26 | 31   | 155  | 0 | 0 |
| 24,5 | 24,3 | 1 | 22 | 16   | 1528 | 1 | 1 |
| 24,6 | 23,6 | 2 | 15 | 73   | 168  | 0 | 0 |
| 24,6 | 23,9 | 2 | 19 | 16   | 842  | 1 | 1 |
| 24,7 | 21,3 | 2 | 13 | 35   | 739  | 1 | 1 |
| 24,7 | 20,8 | 2 | 55 | 145  | 145  | 0 | 1 |
| 24,8 | 23,3 | 2 | 28 | 23   | 1048 | 1 | 1 |
| 24,9 | 22,9 | 2 | 28 | 56   | 914  | 1 | 0 |
| 24,9 | 22,7 | 2 | 16 | 83   | 950  | 1 | 1 |
| 24,9 | 25,6 | 2 | 22 | 17   | 901  | 1 | 0 |
| 25,0 | 24,2 | 2 | 14 | 105  | 1308 | 0 | 1 |
| 25,1 | 24,7 | 2 | 14 | 33   | 1266 | 1 | 1 |
| 25,2 | 23,4 | 2 | 20 | 23   | 1274 | 1 | 1 |
| 25,2 | 19,3 | 2 | 13 | 224  | 224  | 0 | 1 |
| 25,3 | 22,6 | 2 | 32 | 120  | 120  | 0 | 1 |
| 25,3 | 24,1 | 1 | 12 | 139  | 1588 | 1 | 1 |
| 25,4 | 23,6 | 2 | 14 | 11   | 794  | 1 | 1 |
| 25,5 | 22,9 | 2 | 45 | 62   | 1358 | 1 | 1 |
| 25,6 | 22,5 | 2 | 14 | 113  | 171  | 0 | 1 |
| 25,6 | 24,2 | 2 | 19 | 30   | 443  | 0 | 0 |
| 25,6 | 22,1 | 2 | 14 | 13   | 1587 | 1 | 1 |
| 25,6 | 24,2 | 2 | 29 | 700  | 848  | 1 | 1 |
| 25,7 | 24,2 | 1 | 31 | 76   | 76   | 0 | 1 |
| 25,7 | 23,3 | 1 | 19 | 36   | 1190 | 1 | 1 |
| 25,7 | 24,5 | 2 | 19 | 29   | 269  | 0 | 1 |
| 25,8 | 23,2 | 2 | 71 | 71   | 71   | 0 | 1 |
| 25,8 | 22,4 | 1 | 21 | 167  | 811  | 1 | 1 |
| 25,8 | 27,0 | 2 | 17 | 3    | 1632 | 1 | 1 |
| 25,9 | 26,0 | 2 | 14 | 77   | 77   | 0 | 1 |
| 25,9 | 22,5 | 2 | 14 | 18   | 1202 | 1 | 1 |
| 26,2 | 26,4 | 2 | 19 | 137  | 971  | 1 | 1 |
| 26,2 | 25,5 | 2 | 14 | 12   | 1218 | 1 | 0 |
| 26,2 | 23,1 | 1 | 16 | 94   | 976  | 1 | 1 |
| 26,3 | 23,2 | 2 | 14 | 118  | 1113 | 1 | 1 |
| 26,3 | 23,9 | 2 | 15 | 79   | 777  | 0 | 1 |
| 26,4 | 25,4 | 2 | 16 | 49   | 1474 | 1 | 1 |
| 26,4 | 25,4 | 2 | 16 | 10   | 258  | 1 | 1 |
| 26,4 | 25,2 | 2 | 27 | 17   | 931  | 0 | 0 |
| 26,5 | 22,7 | 2 | 23 | 22   | 1059 | 1 | 0 |
| 26,5 | 25,1 | 2 | 44 | 1026 | 1026 | 0 | 1 |
| 26,6 | 27,1 | 2 | 27 | 30   | 945  | 1 | 1 |
| 26,6 | 25,2 | 2 | 17 | 25   | 1118 | 1 | 0 |
| 26,6 | 24,9 | 2 | 15 | 10   | 919  | 1 | 0 |
| 26,9 | 26,4 | 2 | 6  | 6    | 6    | 0 | 0 |
| 26,9 | 22,8 | 1 | 15 | 21   | 1552 | 1 | 1 |
| 27,0 | 20,1 | 2 | 32 | 197  | 197  | 0 | 1 |
| 27,1 | 26,6 | 2 | 14 | 40   | 42   | 0 | 1 |
| 27,2 | 21,6 | 2 | 13 | 12   | 269  | 0 | 1 |
| 27,3 | 25,5 | 1 | 15 | 23   | 1244 | 1 | 1 |
| 27,3 | 25,0 | 2 | 17 | 31   | 487  | 0 | 0 |

|      |      |   |    |     |      |   |   |
|------|------|---|----|-----|------|---|---|
| 27,4 | 24,9 | 2 | 23 | 32  | 1351 | 1 | 1 |
| 27,4 | 27,1 | 2 | 18 | 48  | 48   | 0 | 1 |
| 27,4 | 26,0 | 2 | 20 | 18  | 868  | 1 | 0 |
| 27,5 | 24,7 | 2 | 20 | 20  | 1429 | 1 | 1 |
| 27,5 | 27,4 | 2 | 34 | 42  | 1286 | 1 | 1 |
| 27,6 | 26,4 | 2 | 19 | 18  | 818  | 1 | 1 |
| 27,8 | 26,7 | 2 | 19 | 40  | 407  | 0 | 1 |
| 27,9 | 26,1 | 2 | 15 | 30  | 814  | 1 | 1 |
| 27,9 | 30,8 | 1 | 33 | 81  | 81   | 0 | 1 |
| 27,9 | 26,3 | 2 | 19 | 31  | 606  | 0 | 1 |
| 27,9 | 28,2 | 2 | 18 | 36  | 36   | 0 | 0 |
| 28,0 | 22,5 | 2 | 16 | 26  | 579  | 0 | 1 |
| 28,1 | 26,0 | 2 | 18 | 24  | 1464 | 1 | 1 |
| 28,1 | 25,7 | 2 | 16 | 79  | 1128 | 1 | 1 |
| 28,1 | 24,6 | 2 | 16 | 14  | 1421 | 1 | 1 |
| 28,2 | 26,0 | 2 | 12 | 62  | 62   | 0 | 1 |
| 28,2 | 26,7 | 2 | 14 | 19  | 631  | 0 | 1 |
| 28,2 | 25,8 | 2 | 13 | 12  | 96   | 0 | 1 |
| 28,4 | 26,6 | 2 | 13 | 12  | 1134 | 1 | 1 |
| 28,4 | 26,3 | 2 | 20 | 17  | 968  | 1 | 1 |
| 28,5 | 26,7 | 2 | 39 | 28  | 1209 | 1 | 0 |
| 28,5 | 26,5 | 2 | 25 | 38  | 1253 | 1 | 1 |
| 28,6 | 25,4 | 2 | 15 | 17  | 460  | 0 | 1 |
| 28,7 | 26,8 | 2 | 27 | 24  | 732  | 1 | 1 |
| 28,8 | 28,7 | 2 | 34 | 39  | 1076 | 1 | 1 |
| 29,0 | 28,8 | 2 | 74 | 74  | 74   | 0 | 1 |
| 29,0 | 28,7 | 2 | 51 | 58  | 1224 | 0 | 1 |
| 29,1 | 28,0 | 2 | 26 | 29  | 353  | 0 | 1 |
| 29,1 | 25,0 | 2 | 19 | 27  | 369  | 0 | 1 |
| 29,2 | 28,3 | 2 | 30 | 26  | 635  | 0 | 1 |
| 29,5 | 29,6 | 2 | 15 | 28  | 893  | 1 | 1 |
| 29,6 | 28,2 | 2 | 29 | 35  | 522  | 0 | 1 |
| 29,7 | 25,2 | 2 | 14 | 35  | 1147 | 1 | 1 |
| 30,2 | 25,6 | 2 | 71 | 33  | 101  | 0 | 1 |
| 30,5 | 26,4 | 2 | 20 | 45  | 1033 | 1 | 1 |
| 30,6 | 30,4 | 2 | 24 | 22  | 1162 | 1 | 1 |
| 30,7 | 28,4 | 1 | 23 | 20  | 1618 | 1 | 1 |
| 31,1 | 30,2 | 2 | 19 | 35  | 1281 | 1 | 1 |
| 31,1 | 28,5 | 2 | 31 | 38  | 276  | 0 | 1 |
| 31,2 | 27,2 | 2 | 17 | 23  | 136  | 0 | 1 |
| 31,4 | 26,5 | 1 | 19 | 23  | 1112 | 1 | 1 |
| 31,6 | 28,2 | 2 | 32 | 32  | 32   | 0 | 0 |
| 31,8 | 28,7 | 2 | 17 | 15  | 1314 | 1 | 1 |
| 31,8 | 28,6 | 2 | 17 | 12  | 1636 | 1 | 1 |
| 32,1 | 28,2 | 1 | 32 | 204 | 1198 | 1 | 1 |
| 33,3 | 28,6 | 2 | 19 | 20  | 1016 | 1 | 1 |
| 33,4 | 31,4 | 2 | 17 | 28  | 140  | 0 | 0 |
| 33,8 | 29,1 | 2 | 20 | 16  | 120  | 0 | 0 |
| 34,1 | 30,5 | 2 | 19 | 21  | 1112 | 0 | 1 |
| 34,2 | 38,3 | 2 | 45 | 45  | 45   | 0 | 0 |
| 34,4 | 28,8 | 2 | 35 | 41  | 604  | 0 | 0 |
| 35,3 | 32,2 | 2 | 19 | 151 | 151  | 0 | 1 |
| 36,0 | 30,7 | 2 | 23 | 28  | 1527 | 1 | 1 |
| 37,0 | 33,3 | 2 | 14 | 12  | 1260 | 1 | 1 |
| 47,8 | 49,9 | 2 | 13 | 28  | 28   | 0 | 1 |
